# Supplementary material
Source: publisher figshare collection journal article supplement (https://frontiersin.figshare.com/ndownloader/files/22393083)

**Table S1. Sample ID in this study.** WY means wild population of Yusan stream, WD means wild population of Dachai stream, and C means captive population.

| <b>Group</b> | <b>Sample</b> | <b>Age</b> | <b>Source</b>       |
|--------------|---------------|------------|---------------------|
| WY1          | WY1.1         | Adult      | Wild, YuSan stream  |
|              | WY1.2         | Adult      | Wild, YuSan stream  |
|              | WY1.3         | Adult      | Wild, YuSan stream  |
|              | WY1.4         | Adult      | Wild, YuSan stream  |
| WY2          | WY2.1         | Juvenile   | Wild, YuSan stream  |
|              | WY2.2         | Juvenile   | Wild, YuSan stream  |
|              | WY2.3         | Juvenile   | Wild, YuSan stream  |
|              | WY2.4         | Juvenile   | Wild, YuSan stream  |
|              | WY2.5         | Juvenile   | Wild, YuSan stream  |
|              | WY2.6         | Juvenile   | Wild, YuSan stream  |
| WD1          | WD1.1         | Adult      | Wild, DaChai stream |
|              | WD1.2         | Adult      | Wild, DaChai stream |
|              | WD1.3         | Adult      | Wild, DaChai stream |
|              | WD1.4         | Adult      | Wild, DaChai stream |
|              | WD1.5         | Adult      | Wild, DaChai stream |
|              | WD1.6         | Adult      | Wild, DaChai stream |
| WD2          | WD2.1         | Juvenile   | Wild, DaChai stream |
|              | WD2.2         | Juvenile   | Wild, DaChai stream |
|              | WD2.3         | Juvenile   | Wild, DaChai stream |
|              | WD2.4         | Juvenile   | Wild, DaChai stream |
| C1           | C1.1          | Adult      | Captive             |
|              | C1.2          | Adult      | Captive             |
|              | C1.3          | Adult      | Captive             |
|              | C1.4          | Adult      | Captive             |
|              | C1.5          | Adult      | Captive             |
|              | C1.6          | Adult      | Captive             |
| C2           | C2.1          | Juvenile   | Captive             |
|              | C2.2          | Juvenile   | Captive             |
|              | C2.3          | Juvenile   | Captive             |
|              | C2.4          | Juvenile   | Captive             |
|              | C2.5          | Juvenile   | Captive             |

**Fig. S1 operational taxonomic units (OTUs) clustering and annotation statistics for each sample.** Red volumes indicate the total tags which are effective tags for each sample (average: 52342); Blue volumes indicate taxon tags (average: 51338) used to construct OTUs and get annotation information; Green volumes indicate unclassified tags (average: 0) which mean the tags without annotation information; Orange volumes indicate unique tags (average: 1004) whose frequency is 1, and cannot be clustered into OTUs; purple volumes indicate OTUs (average: 262) obtained per sample. The numbers above each volume indicate the tags for each sample.

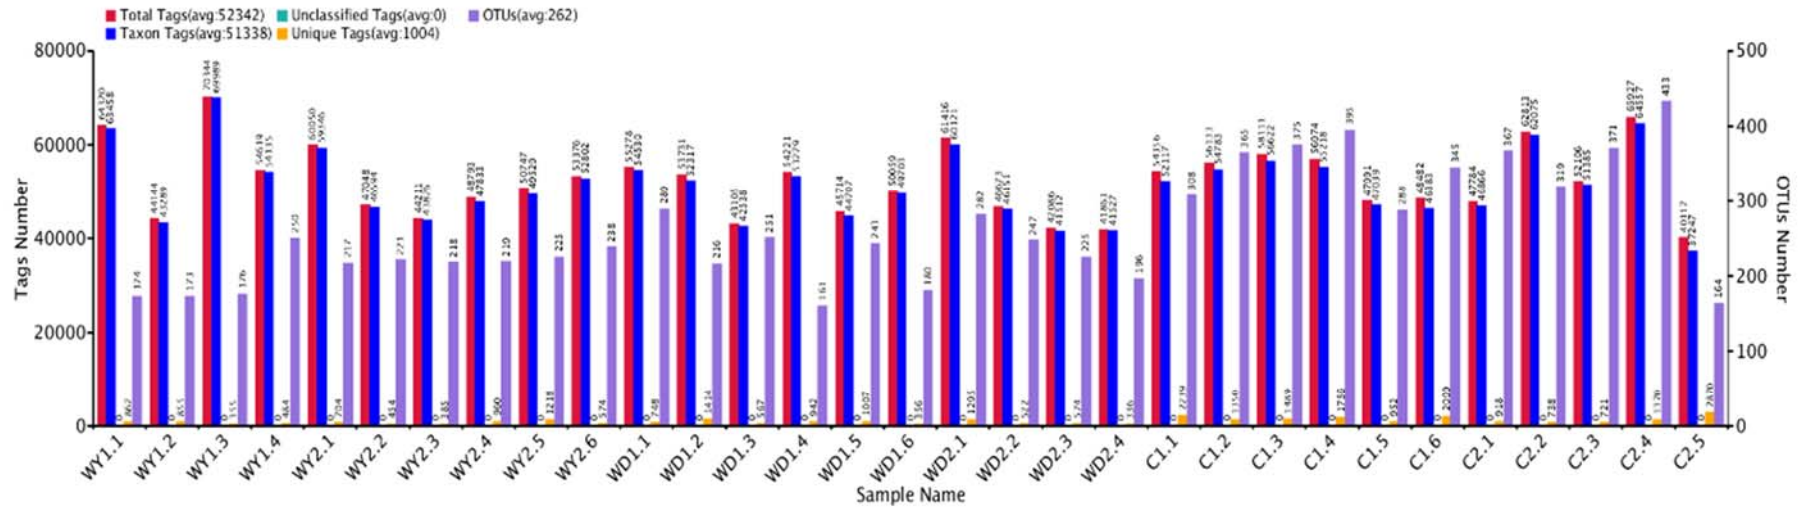

**Fig. S2 Rarefaction curves of each sample.** Different colors of the lines indicate different sample, respectively.

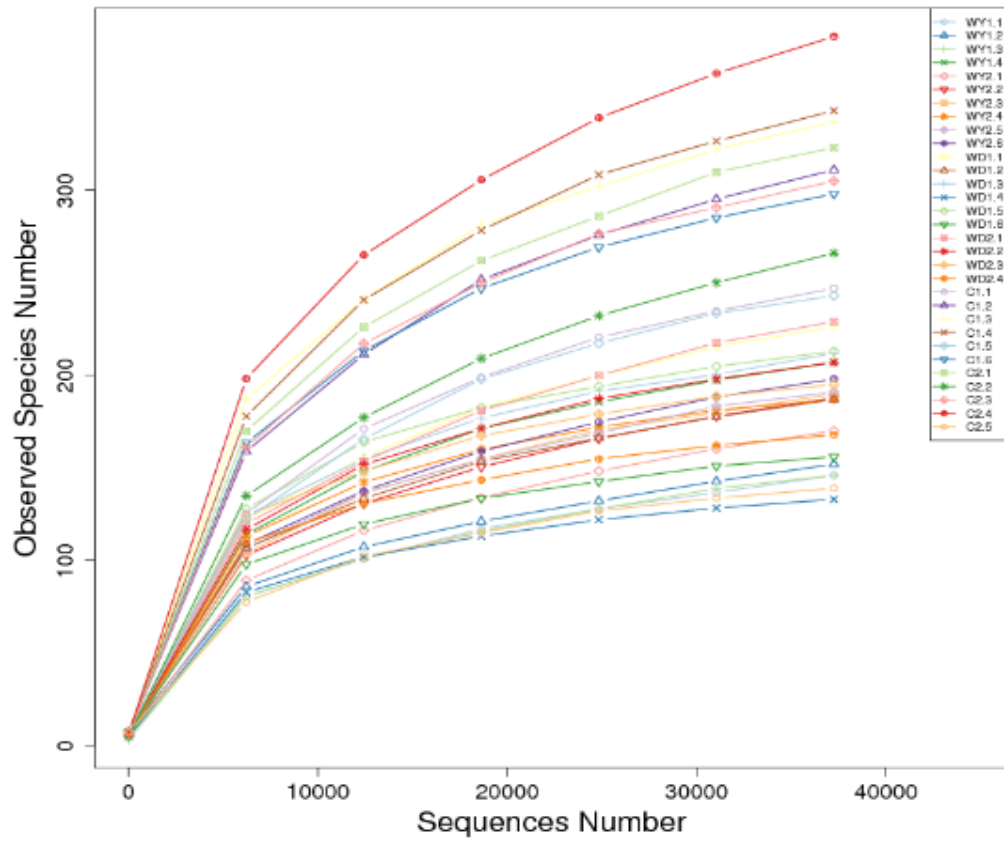

**Fig. S3 Species accumulation of samples.** Data are expressed as mean  $\pm$  SEM.

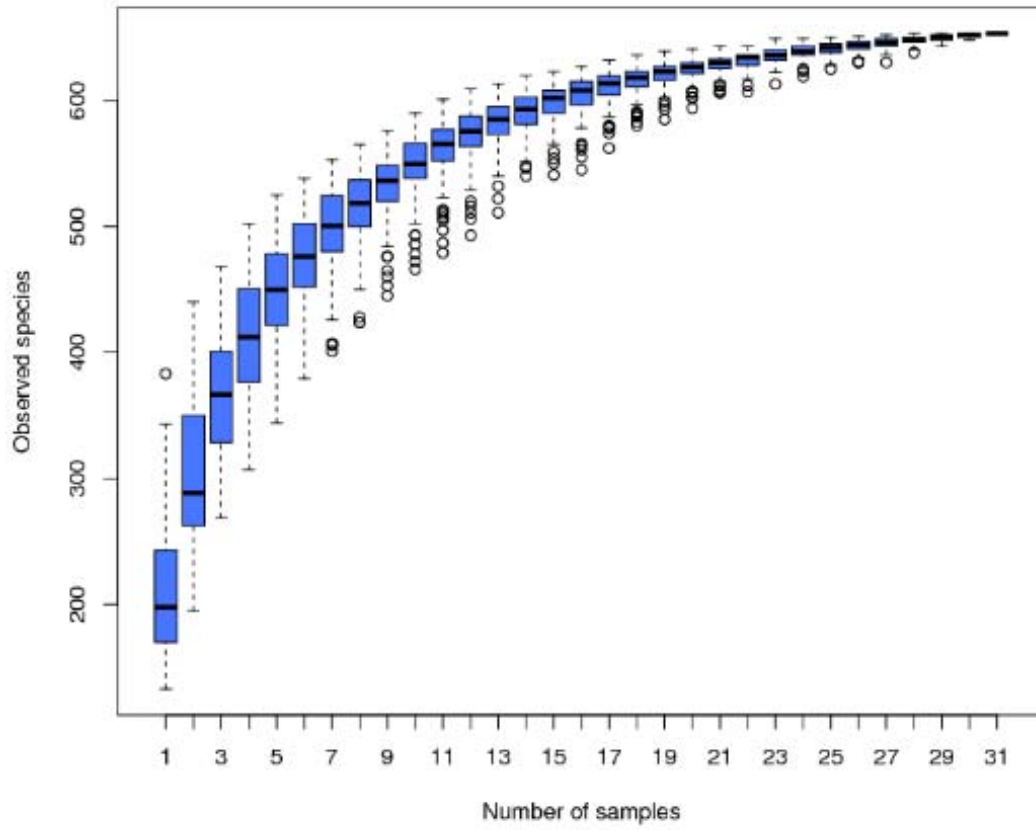

Supplement: Supplementary file [file 22393083]
